# Supplementary material for: Altruistic feeding and cell-cell signaling during bacterial differentiation actively enhance phenotypic heterogeneity
Source: PubMed Central journal article supplement (PMC11188070; doi:10.1101/2024.03.27.587046), 2024-03-27
Supplement: NIHPP2024.03.27.587046v1-supplement-1.pdf [file NIHPP2024.03.27.587046v1-supplement-1.pdf]

## **SUPPLEMENTAL INFORMATION**

**(Figures S1-S3)**

**A**

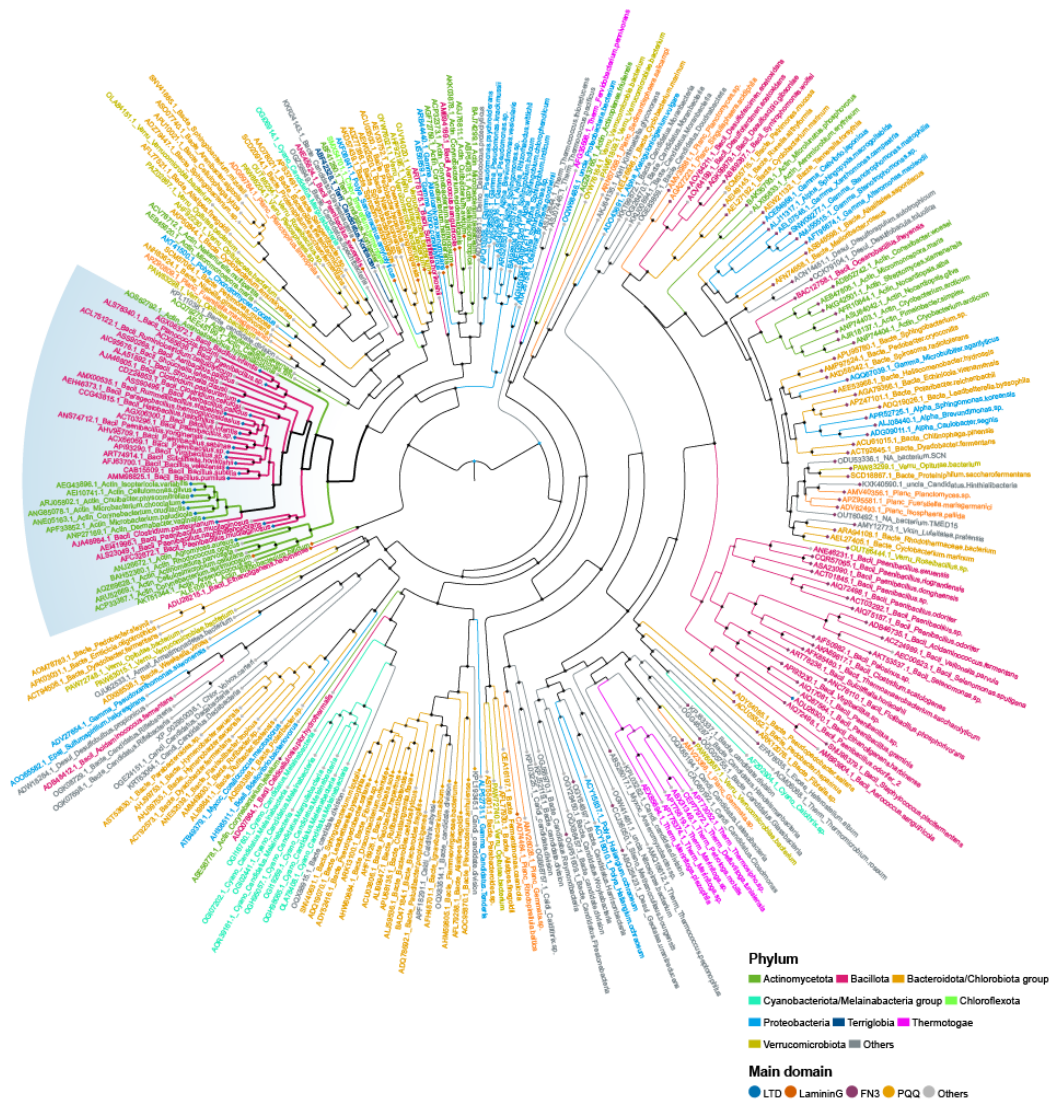

**B**

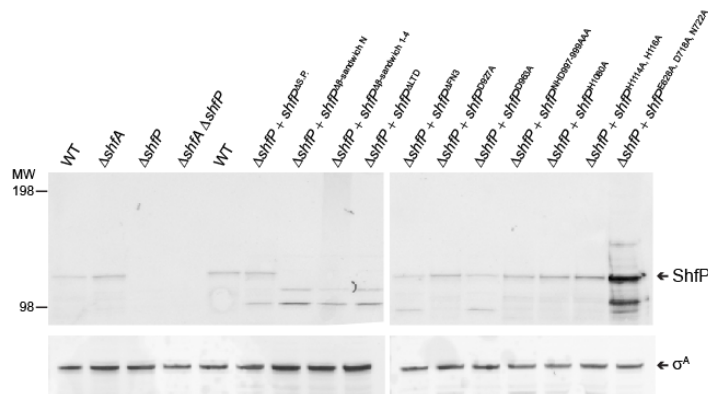

**Figure S1. Phylogenetic analysis of ShfP and calcineurin-like proteins.** (A) A phylogenetic tree of a representative set of extracellular calcineurin-like domains from the homologs of the ShfP family is shown. The name of each member is shown with its accession number, phylum, and organism name. (B) Western blot against ShfP (top panel) for the following strains: WT (lane 1);  $\Delta shfA$  mutant (lane 2);  $\Delta shfP$  mutant (lane 3);

*ΔshfA ΔshfP* mutant (lane 4); *ΔshfA ΔshfP amyE::shfP* (lane 5); *ΔshfA ΔshfP amyE::shfP (Δ2-28)* (lane 6); *ΔshfA ΔshfP amyE::shfP (Δ27-139)* (lane 7); *ΔshfA ΔshfP amyE::shfP(Δ293-732)* (lane 8); *ΔshfA ΔshfP amyE::shfP(Δ140-280)* (lane 9); *ΔshfA ΔshfP amyE::shfP(Δ1154-1289)* (lane 10); *ΔshfA ΔshfP amyE::shfP(D927A)* (lane 11); *ΔshfA ΔshfP amyE::shfP(D963A)* (lane 12); *ΔshfA ΔshfP amyE::shfP(NHD997-999AAA)* (lane 13); *ΔshfA ΔshfP amyE::shfP(H1080A)* (lane 14); *ΔshfA ΔshfP amyE::shfP(H114A, H116A)* (lane 15); *ΔshfA ΔshfP amyE::shfP(E628A, D718A, N722A)* (lane 16). Anti-sigA used as a loading control (bottom panel). Strains: PY79; CW202; TD517; TD507; CC2; CC19; CC131; CC20; CC138; CC14; CC15; CC16; CC17; CC18; CC166.

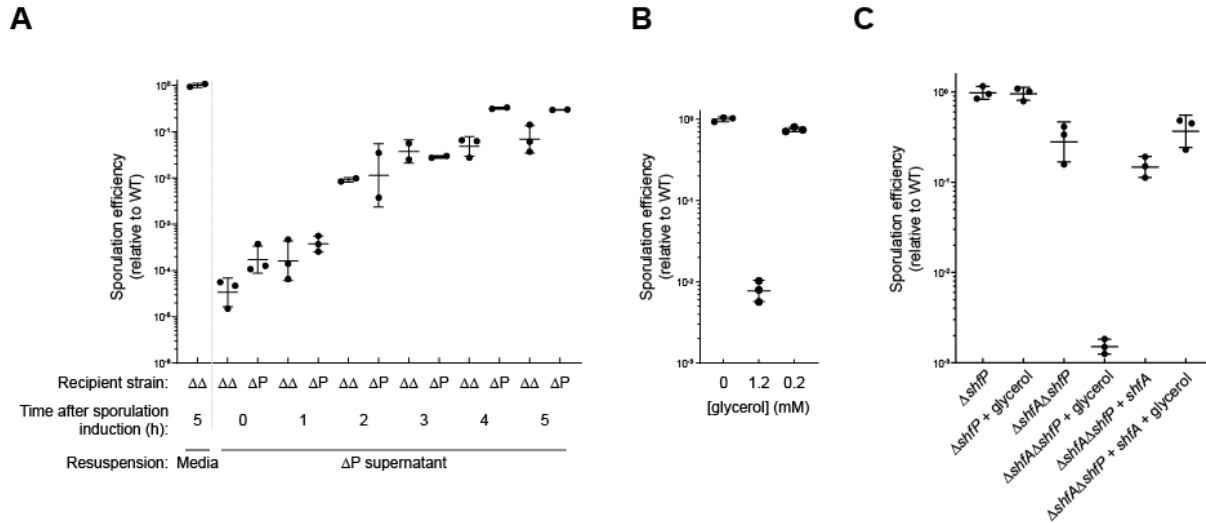

**Figure S2. Extracellular glycerol inhibits sporulation.** (A) Cell-free supernatant derived from the  $\Delta shfP$  mutant strain show no sporulation suppression activity. Sporulation efficiency of the  $\Delta shfA \Delta shfP$  (TD507) and  $\Delta shfP$  (TD517) mutant recipient strains cultured for the indicated times in synchronous sporulation media prior to the addition of cell-free supernatants derived from the  $\Delta shfP$  mutant strain. Sporulation efficiencies are reported as normalized values to that of the recipient strain cultured in the absence of supernatant. Mean and standard deviation of two or more independent cultures for each condition are shown. (B) The addition of glycerol to sporulation media causes a sporulation defect. Average sporulation efficiency of the  $\Delta shfA \Delta shfP$  (TD507) mutant strain cultured in synchronous sporulation media with the indicated amount of glycerol added. Sporulation efficiencies are reported as normalized values to that of the recipient strain cultured in the absence of glycerol. Mean and standard deviation of three independent cultures for each condition are shown. (C) Sporulation efficiencies of the  $\Delta shfP$  (TD517),  $\Delta shfA \Delta shfP$  (TD507), and  $\Delta shfA \Delta shfP thrC::shfA$  (CC221) strains cultured in synchronous sporulation media in the presence or absence of 1.3 mM glycerol. Sporulation efficiencies are reported as normalized values to that of the  $\Delta shfP$  (TD517) recipient strain cultured in the absence of glycerol. Bars represent mean; errors: S.D.

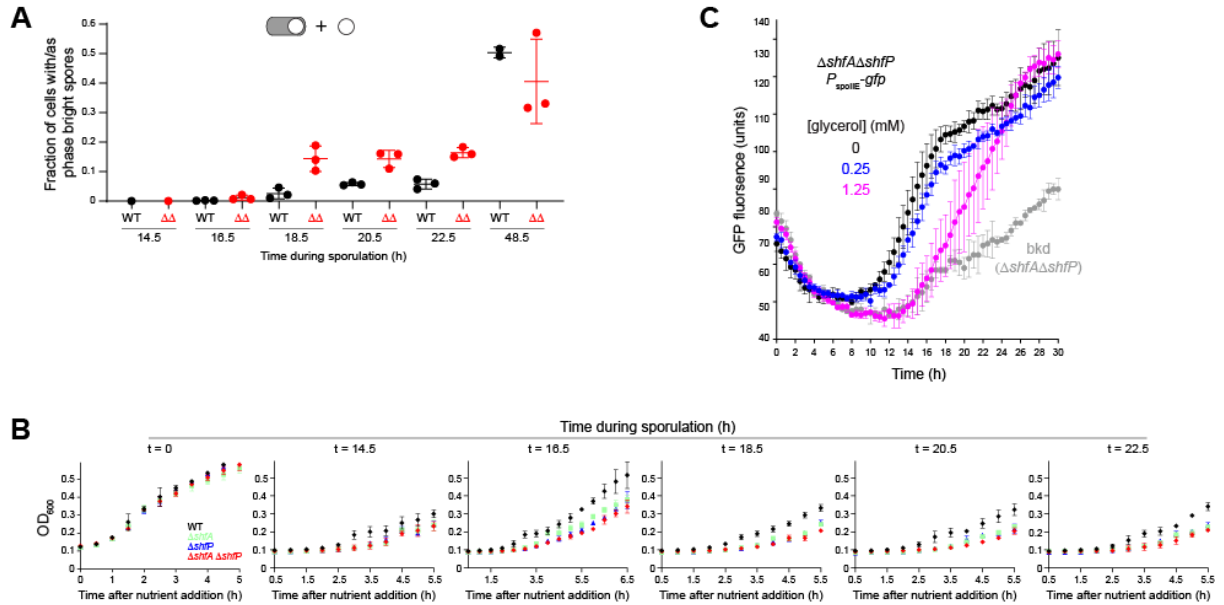

**Figure S3. Glycerol secretion delays formation of DIC-bright cells** (A) Fraction of (black) WT (MF277) or (red)  $\Delta shfA \Delta shfP$  (CC219) cells forming DIC-bright forespore or mature spore structures (as shown in the cartoon depictions above) at the indicated time points. Bars represent mean; errors: S.D.; data points represent a measure from an independent experiment. (B) WT cells respond faster to nutrient replenishment than  $\Delta shfA \Delta shfP$  mutant cells when grown under asynchronous sporulation conditions. WT (MF277),  $\Delta shfA$  (CC218),  $\Delta shfP$  (CC220) and  $\Delta shfA \Delta shfP$  (CC219) mutant strains were grown in asynchronous sporulation media. At the indicated time points, 10% of each culture was back diluted in fresh nutrient rich LB media and the OD<sub>600</sub> was measured over time. Mean and standard deviation of three independent cultures are shown. The initial doubling time for each strain at the indicated time points of subculturing were used for Fig 5B. (C) The addition of glycerol to sporulation media causes a delay in entry into sporulation. The  $\Delta shfA \Delta shfP P_{spoIIIE-gfp}$  (CC219) reporter strain and the non-gfp fusion strain  $\Delta shfA \Delta shfP$  (TD507) were grown in synchronous sporulation media with the indicated amount of glycerol added. GFP fluorescence was recorded over time (hours). Mean and standard deviation of four or more independent cultures for each strain and condition are shown.
